# Supplementary material for: Detection of naturally occurring alloantibody by an in‐clinic antiglobulin‐enhanced and standard crossmatch gel column test in non‐transfused domestic shorthair cats
Source: PubMed Central journal article supplement — J Vet Intern Med. 2018 Dec 17;33(2):588–95. doi: 10.1111/jvim.15381 (PMC6430866; doi:10.1111/jvim.15381), 2018-12-17
Supplement: JVIM-33-588-s001.pdf [file JVIM-33-588-s001.pdf]

**Table Supplementary 1.** Cat population of the study with article number, sex, age, group and packed cell volume for each cat. These 49 cats were all domestic shorthair seronegative for FIV and FeLV.

DSH = Domestic shorthair

| Name  | Sex    | Age<br>(months) | Group | PCV<br>(%) |
|-------|--------|-----------------|-------|------------|
| CAT1  | Female | 24              | A     | 38         |
| CAT2  | Female | 44              | A     | 42         |
| CAT3  | Female | 6               | A     | 44         |
| CAT4  | Female | 6               | A     | 50         |
| CAT5  | Male   | 6               | A     | 46         |
| CAT6  | Male   | 6               | A     | 46         |
| CAT7  | Male   | 6               | A     | 48         |
| CAT8  | Male   | 7               | A     | 50         |
| CAT9  | Male   | 7               | A     | 50         |
| CAT10 | Male   | 25              | A     | 52         |
| CAT11 | Female | 6               | A     | 46         |
| CAT12 | Female | 7               | A     | 44         |
| CAT13 | Female | 7               | A     | 44         |
| CAT14 | Female | 7               | A     | 40         |
| CAT15 | Male   | 7               | A     | 40         |
| CAT16 | Male   | 11              | A     | 46         |
| CAT17 | Male   | 6               | A     | 42         |
| CAT18 | Male   | 8               | A     | 50         |
| CAT19 | Male   | 6               | A     | 50         |
| CAT20 | Female | 11              | A     | 46         |
| CAT21 | Male   | 10              | A     | 48         |
| CAT22 | Male   | 6               | A     | 44         |
| CAT23 | Male   | 11              | A     | 46         |
| CAT24 | Female | 7               | A     | 48         |
| CAT25 | Female | 6               | A     | 44         |
| CAT26 | Male   | 6               | A     | 46         |
| CAT27 | Male   | 22              | A     | 42         |
| CAT28 | Male   | 12              | A     | 42         |
| CAT29 | Female | 9               | A     | 44         |
| CAT30 | Male   | 7               | A     | 46         |

|       |        |    |    |    |
|-------|--------|----|----|----|
| CAT31 | Male   | 6  | A  | 50 |
| CAT32 | Female | 7  | A  | 46 |
| CAT33 | Female | 9  | A  | 48 |
| CAT34 | Male   | 10 | A  | 48 |
| CAT35 | Female | 15 | B  | 46 |
| CAT36 | Female | 7  | B  | 44 |
| CAT37 | Female | 14 | B  | 44 |
| CAT38 | Female | 7  | B  | 46 |
| CAT39 | Male   | 7  | B  | 48 |
| CAT40 | Female | 19 | B  | 42 |
| CAT41 | Female | 6  | B  | 40 |
| CAT42 | Male   | 7  | B  | 50 |
| CAT43 | Male   | 6  | B  | 48 |
| CAT44 | Male   | 50 | B  | 42 |
| CAT45 | Male   | 6  | B  | 44 |
| CAT46 | Male   | 8  | B  | 46 |
| CAT47 | Female | 9  | B  | 44 |
| CAT48 | Male   | 51 | AB | 44 |
| CAT49 | Male   | 9  | AB | 42 |
